# Supplementary material
Source: publisher figshare collection journal article supplement (https://rs.figshare.com/ndownloader/files/14367041)
Supplement: Supplementary file 1 [file 14367041]

SPECIES	ARG_NAME	COEXIST_WITH	N_GENOMES	ARG	BOTH ARG and Acr/CRISPR-Cas	OBS (ARG and ACR/CRISPR-Cas)	EXP(Both ARG and Acr/CRISPR-Cas)	OBS (Both ARG and Acr/CRISPR-Cas)+ PSC	EXP(Both ARG and CRISPR-Cas/ACR)+PSC	OE	LOG_OE	QTL_005	QTL_995
Pseudomonas aeruginosa	efflux_pump	Anti-CRISPR	2021	1986	924	924	907.9980208	924.000001	907.9980218	1.017623364	0.017469873	0.010445258	0.025558896
Pseudomonas aeruginosa	fluoroquinolones_resistance	Anti-CRISPR	2021	682	924	333	311.8099951	333.000001	311.8099961	1.067958068	0.065748478	-0.01835038	0.144819683
Pseudomonas aeruginosa	polymyxin_resistance	Anti-CRISPR	2021	1975	924	921	902.9688273	921.000001	902.9688283	1.019968765	0.019772005	0.011515472	0.028986859
Pseudomonas aeruginosa	efflux_pump	CRISPR-Cas	2021	1986	1060	1038	1041.642751	1038.000001	1041.642752	0.996502879	-0.003503251	-0.010651637	0.003522721
Pseudomonas aeruginosa	fluoroquinolones_resistance	CRISPR-Cas	2021	682	1060	446	357.7041069	446.000001	357.7041079	1.24684059	0.220612824	0.157303865	0.279900198
Pseudomonas aeruginosa	polymyxin_resistance	CRISPR-Cas	2021	1975	1060	1032	1035.87333	1032.000001	1035.873331	0.996260807	-0.003746201	-0.012330619	0.004692766
